# Supplementary material for: Effects of Temperature and Salinity on the LMS (Lysosomal Membrane Stability) Biomarker in Clams Donax trunculus and Chamelea gallina
Source: MDPI journal article supplement (doi:10.3390/app14072712), 2024-03-23
Supplement: s1 [file s1]

## SUPPLEMENTARY MATERIAL

**Table S1.** Descriptive variables of the organisms used in LMS of each species: size, neutral red retention time (NRRT) and percentage lysosomal membrane stability (%LMS). T: temperature; S: salinity; N: individuals. Data are expressed as mean  $\pm$  SE.

| Test treatment |       |    | <i>Chamelea gallina</i> |                  |                 | <i>Donax trunculus</i> |                  |                |
|----------------|-------|----|-------------------------|------------------|-----------------|------------------------|------------------|----------------|
| T              | S     | N  | Size (mm)               | NRRT (min)       | LMS (%)         | Size (mm)              | NRRT (min)       | LMS (%)        |
| Low            | 27-28 | 16 | 18.2 $\pm$ 0.7          | 55.3 $\pm$ 9.5   | 53.3 $\pm$ 4.1  | 23.4 $\pm$ 0.5         | 86.3 $\pm$ 11.9  | 64.1 $\pm$ 5.7 |
|                | 32-33 | 16 | 17.8 $\pm$ 0.7          | 116.3 $\pm$ 14.0 | 72.2 $\pm$ 5.4  | 22.9 $\pm$ 0.3         | 69.4 $\pm$ 8.9   | 60.6 $\pm$ 3.6 |
|                | 37-38 | 16 | 16.9 $\pm$ 0.6          | 68.4 $\pm$ 14.0  | 52.2 $\pm$ 13.0 | 22.9 $\pm$ 0.3         | 105.0 $\pm$ 6.7  | 72.5 $\pm$ 2.4 |
| Medium         | 27-28 | 16 | 23.4 $\pm$ 0.5          | 131.3 $\pm$ 16.6 | 59.8 $\pm$ 6.1  | 23.2 $\pm$ 0.4         | 92.8 $\pm$ 19.9  | 55.9 $\pm$ 7.0 |
|                | 32-33 | 16 | 24.1 $\pm$ 0.9          | 60.9 $\pm$ 12.8  | 49.2 $\pm$ 5.1  | 22.3 $\pm$ 0.3         | 165.9 $\pm$ 10.7 | 82.7 $\pm$ 5.1 |
|                | 37-38 | 16 | 25.4 $\pm$ 0.5          | 133.1 $\pm$ 11.9 | 71.3 $\pm$ 4.9  | 23.6 $\pm$ 0.5         | 136.9 $\pm$ 13.1 | 72.8 $\pm$ 6.7 |
| High           | 27-28 | 16 | 24.4 $\pm$ 0.4          | 68.4 $\pm$ 11.7  | 50.8 $\pm$ 4.6  | -                      | -                | -              |
|                | 32-33 | 16 | 23.6 $\pm$ 0.4          | 65.6 $\pm$ 10.2  | 53.1 $\pm$ 5.0  | 21.1 $\pm$ 0.4         | 28.1 $\pm$ 12.7  | 20.8 $\pm$ 7.0 |
|                | 37-38 | 16 | 23.3 $\pm$ 0.3          | 82.5 $\pm$ 15.1  | 61.2 $\pm$ 3.6  | 20.2 $\pm$ 0.6         | 42.2 $\pm$ 9.9   | 36.9 $\pm$ 5.4 |

**Table S2.** Means for groups in homogeneous subsets of Tukey's HSD ( $p < 0.05$ ) test of neutral red retention time (NRRT) and percentage of lysosomal membrane stability (%LMS) among the 9 treatments for *C. gallina* ( $n = 16$ ).

| NRRT           |    |                              |        |        | %LMS           |    |                              |       |  |
|----------------|----|------------------------------|--------|--------|----------------|----|------------------------------|-------|--|
| Test condition | N  | Subset for a $\alpha = 0.05$ |        |        | Test condition | N  | Subset for a $\alpha = 0.05$ |       |  |
|                |    | 1                            | 2      | 3      |                |    | 1                            | 2     |  |
| 12°C/ 27-28    | 16 | 55.31                        |        |        | 20°C/32-33     | 16 | 49.17                        |       |  |
| 20°C/32-33     | 16 | 60.94                        |        |        | 27.5°C/27-28   | 16 | 50.75                        |       |  |
| 27.5°C/32-33   | 16 | 65.63                        |        |        | 12°C/37-38     | 16 | 52.17                        |       |  |
| 12°C/37-38     | 16 | 68.44                        |        |        | 27.5°C/32-33   | 16 | 53.08                        |       |  |
| 27.5°C/27-28   | 16 | 68.44                        |        |        | 12°C/27-28     | 16 | 53.34                        |       |  |
| 27.5°C/37-38   | 16 | 82.50                        | 82.50  |        | 20°C/27-28     | 16 | 59.75                        | 59.75 |  |
| 12°C/32-33     | 16 |                              | 116.25 | 116.25 | 27.5°C/37-38   | 16 | 61.17                        | 61.17 |  |
| 20°C/27-28     | 16 |                              |        | 131.25 | 20°C/37-38     | 16 |                              | 71.33 |  |
| 20°C/37-38     | 16 |                              |        | 133.13 | 12°C/32-33     | 16 |                              | 72.17 |  |

**Table S3.** Pairwise comparisons of LMS (expressed as NRRT and %LMS) at three salinity (S) levels (27-28, 32-33 and 37-38) for each temperature (T) and at three temperature levels (low, medium and high) for each salinity, for both species.

| Factor |              | <i>C. gallina</i> |                 | <i>D. trunculus</i> |                 |
|--------|--------------|-------------------|-----------------|---------------------|-----------------|
| T      | S            | $\alpha$ (NRRT)   | $\alpha$ (%LMS) | $\alpha$ (NRRT)     | $\alpha$ (%LMS) |
| Low    | 27-28 /32-33 | .003              | .014            | ns                  | ns              |
|        | 27-28 /37-38 | ns                | ns              | ns                  | ns              |
|        | 32-33 /37-38 | .003              | .014            | .040                | ns              |
| Medium | 27-28 /32-33 | .002              | ns              | .005                | .014            |
|        | 27-28 /37-38 | ns                | ns              | ns                  | ns              |
|        | 32-33 /37-38 | .002              | .017            | ns                  | ns              |
| High   | 27-28 /32-33 | ns                | ns              | -                   | -               |
|        | 27-28 /37-38 | ns                | ns              | -                   | -               |
|        | 32-33 /37-38 | ns                | ns              | ns                  | ns              |
| S      | T            |                   |                 |                     |                 |
| 27-28  | Low/Medium   | .007              | ns              | ns                  | ns              |
|        | Low/High     | ns                | ns              | -                   | -               |
|        | Medium /High | .007              | ns              | -                   | -               |
| 32-33  | Low/Medium   | .004              | .005            | .000                | .000            |
|        | Low/High     | .004              | .005            | .000                | .000            |
|        | Medium /High | ns                | ns              | .000                | .000            |
| 37-38  | Low/Medium   | .005              | .032            | ns                  | ns              |
|        | Low/High     | ns                | ns              | .000                | .000            |
|        | Medium /High | .005              | ns              | .000                | .000            |

– no data in this treatment. ns =  $p > 0.05$ . ANOVA – Tukey's HSD *post hoc*,  $p$ -value 0.05.

**Table S4.** Pairwise comparisons of the condition index (CI) of the four salinities (T) levels (reference, 27-28, 32-33 and 37-38) for each temperature (S) (reference, low, medium and high).

| Factor    |        |                | <i>C. gallina</i> |                    | <i>D. trunculus</i> |                    |
|-----------|--------|----------------|-------------------|--------------------|---------------------|--------------------|
| T (°C)    | S      |                | $\alpha$ (%CI)    | $\alpha$ (CI size) | $\alpha$ (%CI)      | $\alpha$ (CI size) |
| Reference | 15.4   | 36.9 /27-28    | -                 | -                  | -                   | -                  |
|           | Low    | 27-28 /32-33   | ns                | ns                 | ns                  | ns                 |
|           |        | 36.9 /32-33    | -                 | -                  | -                   | -                  |
|           |        | 27-28 /37-38   | ns                | ns                 | ns                  | ns                 |
|           |        | 36.9 /37-38    | -                 | -                  | -                   | -                  |
|           |        | 32-33 /37-38   | ns                | ns                 | ns                  | ns                 |
| Reference | 19.5   | 36.8 /27-28    | ns                | .040               | .007                | ns                 |
|           | Medium | 27-28 /32-33   | ns                | ns                 | ns                  | ns                 |
|           |        | 36.8 /32-33    | ns                | .040               | .007                | .000               |
|           |        | 27-28 /37-38   | .006              | ns                 | .007                | ns                 |
|           |        | 36.8 /37-38    | ns                | .040               | ns                  | .000               |
|           |        | 32-33 /37-38   | ns                | ns                 | ns                  | ns                 |
| Reference | 23.5   | 37.1 /27-28    | .007              | ns                 | -                   | -                  |
|           | High   | 27-28 /32-33   | ns                | ns                 | -                   | -                  |
|           |        | 37.1 /32-33    | .007              | .001               | .000                | ns                 |
|           |        | 27-28 /37-38   | ns                | ns                 | -                   | -                  |
|           |        | 37.1 /37-38    | .007              | .001               | .000                | ns                 |
|           |        | 32 - 33 /37-38 | ns                | ns                 | ns                  | ns                 |

|       |              |      |      |      |      |
|-------|--------------|------|------|------|------|
| 27-28 | Low/Medium   | ns   | .000 | .000 | .005 |
|       | Low/High     | ns   | .000 | -    | -    |
|       | Medium /High | ns   | ns   | -    | -    |
| 32-33 | Low/Medium   | .000 | .000 | .000 | ns   |
|       | Low/High     | ns   | .000 | .000 | .000 |
|       | Medium /High | .000 | ns   | .000 | .000 |
| 37-38 | Low/Medium   | .000 | .000 | .000 | ns   |
|       | Low/High     | ns   | .000 | .000 | .000 |
|       | Medium /High | .000 | ns   | ns   | .000 |

– no data in this treatment. ns =  $p > 0.05$ . ANOVA – Tukey's HSD *post hoc*, p-value 0.05.

**Table S5.** Correlation analysis between the different variables for *C. gallina*: salinity (S), temperature (T), condition index (CI), neutral red retention time (NRRT) and percentage of lysosomal membrane stability (%LMS) ( $n = 9$ ).

| Variable    |                    | Salinity | Temperature | CI    | NRRT   | %LMS   |
|-------------|--------------------|----------|-------------|-------|--------|--------|
| Salinity    | Coeff. correlation | 1.000    | .000        | .390  | .162   | .341   |
|             | Sig. (two-way)     | -        | 1.000       | .300  | .676   | .369   |
| Temperature | Coeff. correlation | .000     | 1.000       | .000  | -.126  | -.225  |
|             | Sig. (two-way)     | 1.000    | -           | 1.000 | .746   | .560   |
| CI          | Coeff. correlation | .390     | .000        | 1.000 | .431   | .265   |
|             | Sig. (two-way)     | .300     | 1.000       | -     | .247   | .491   |
| NRRT        | Coeff. correlation | .162     | -.126       | .431  | 1.000  | .881   |
|             | Sig. (two-way)     | .676     | .746        | .247  | -      | .002** |
| %LMS        | Coeff. correlation | .341     | -.225       | .265  | .881   | 1.000  |
|             | Sig. (two-way)     | .369     | .560        | .491  | .002** | -      |

\*\*The correlation is significant at the 0.01 level (two-way).

**Table S6.** Means for groups in homogeneous subsets of Tukey's HSD ( $p < 0.05$ ) test of neutral red retention time (NRRT) among the 9 treatments for *D. trunculus* ( $n = 16$ ).

| Test condition | N  | Subset for a $\alpha = 0.05$ |       |       |        |        |        |
|----------------|----|------------------------------|-------|-------|--------|--------|--------|
|                |    | 1                            | 2     | 3     | 4      | 5      | 6      |
| 27.5°C/27-28   | -  |                              |       |       |        |        |        |
| 27.5°C/32-33   | 16 | 30.00                        |       |       |        |        |        |
| 27.5°C/37-38   | 16 | 42.19                        | 42.19 |       |        |        |        |
| 12°C/32-33     | 16 |                              | 69.38 | 69.38 |        |        |        |
| 12°C/27-28     | 16 |                              |       | 86.25 | 86.25  |        |        |
| 20°C/27-28     | 16 |                              |       | 92.81 | 92.81  |        |        |
| 12°C/37-38     | 16 |                              |       |       | 105.00 | 105.00 |        |
| 20°C/37-38     | 16 |                              |       |       |        | 136.88 | 136.88 |
| 20°C/32-33     | 16 |                              |       |       |        |        | 165.94 |

**Table S7.** Means for groups in homogeneous subsets of Tukey's HSD ( $p < 0.05$ ) test of percentage of lysosomal membrane stability (%LMS) among the 9 treatments for *D. trunculus* ( $n = 16$ ).

| Test condition | N  | Subset for $\alpha = 0.05$ |       |       |       |
|----------------|----|----------------------------|-------|-------|-------|
|                |    | 1                          | 2     | 3     | 4     |
| 27.5°C/27-28   | -  |                            |       |       |       |
| 27.5°C/32-33   | 16 | 21.87                      |       |       |       |
| 27.5°C/37-38   | 16 | 36.94                      | 36.94 |       |       |
| 20°C/27-28     | 16 |                            | 55.94 | 55.94 |       |
| 12°C/32-33     | 16 |                            | 60.81 | 60.81 |       |
| 12°C/27-28     | 16 |                            |       | 64.13 | 64.13 |
| 20°C/37-38     | 16 |                            |       | 72.50 | 72.50 |
| 12°C/37-38     | 16 |                            |       | 72.81 | 72.81 |
| 20°C/32-33     | 16 |                            |       |       | 82.69 |

**Table S8.** Correlation analysis between the different variables for *D. trunculus*: salinity, temperature, condition index (CI), neutral red retention time (NRRT) and percentage of lysosomal membrane stability (%LMS) ( $n = 8$ ).

| Variable    |                    | Salinity | Temperature | %CI     | NRRT   | %LMS   |
|-------------|--------------------|----------|-------------|---------|--------|--------|
| Salinity    | Coeff. correlation | 1.000    | .000        | -.195   | .071   | .030   |
|             | Sig. (two-way)     | -        | 1.000       | .643    | .868   | .945   |
| Temperature | Coeff. correlation | .000     | 1.000       | -.976** | -.422  | -.624  |
|             | Sig. (two-way)     | 1.000    | -           | .000    | .298   | .098   |
| %CI         | Coeff. correlation | -.195    | -.976**     | 1.000   | .562   | .737   |
|             | Sig. (two-way)     | .643     | .000        | -       | .147   | .037*  |
| NRRT        | Coeff. correlation | .071     | -.422       | .562    | 1.000  | .969   |
|             | Sig. (two-way)     | .868     | .298        | .147    | -      | .000** |
| %LMS        | Coeff. correlation | .030     | -.624       | .737    | .969   | 1.000  |
|             | Sig. (two-way)     | .945     | .098        | .037*   | .000** | -      |

\*The correlation is significant at the 0.05 level and \*\* at the 0.01 level(two-way).
